# Supplementary material for: Gastruloid Development Competence Discriminates Different States of Pluripotency
Source: PubMed Central journal article supplement — Stem Cell Reports. 2021 Jan 21;16(2):354–69. doi: 10.1016/j.stemcr.2020.12.013 (PMC7878839; doi:10.1016/j.stemcr.2020.12.013), 2021-01-21
Supplement: mmc1.pdf [file mmc1.pdf]

**Stem Cell Reports, Volume 16**

## **Supplemental Information**

### **Gastruloid Development Competence Discriminates Different States of Pluripotency**

**Federica Cermola, Cristina D'Aniello, Rosarita Tatè, Dario De Cesare, Alfonso Martinez-Arias, Gabriella Minchiotti, and Eduardo Jorge Patriarca**

|    |                                      |
|----|--------------------------------------|
| 1  | <b>SUPPLEMENTAL INFORMATION</b>      |
| 2  |                                      |
| 3  | Figures S1-S4                        |
| 4  |                                      |
| 5  | Tables S1-S2                         |
| 6  |                                      |
| 7  | Supplemental Experimental Procedures |
| 8  |                                      |
| 9  |                                      |
| 10 |                                      |
| 11 |                                      |
| 12 |                                      |

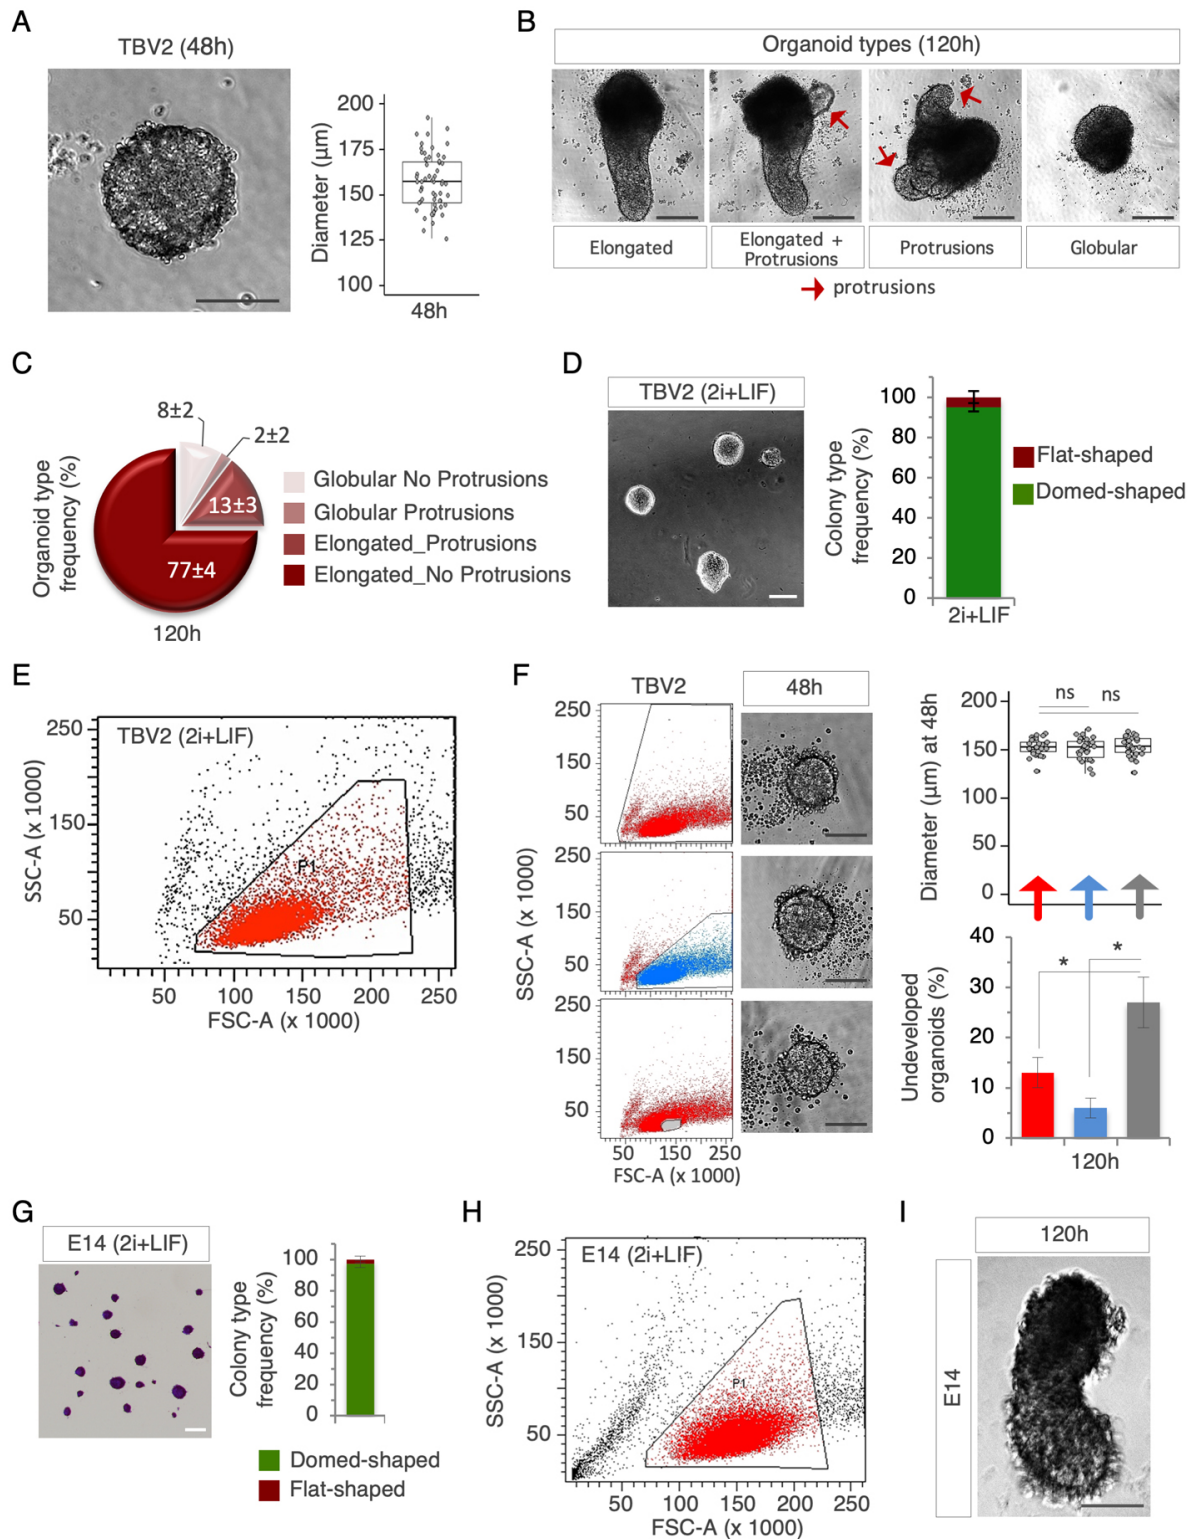

1  
2 **Figure S1. Experimental set up of the optimised gastruloid assay, Related to Figure 1. (A)**  
3 Representative picture of TBV2 mESCs (WT) aggregates at 48h after aggregation (left) and box  
4 plot diagram (right) of the distribution of the aggregates' diameter (n=3; 60 gastruloids analysed).

1 (B) Representative pictures of different organoids' phenotypes at 120h after aggregation. Red  
2 arrows indicate protrusions (bar=100  $\mu$ m). (C) Pie chart representing the percentage of the  
3 different phenotypic outcomes showed in panel B. Data are mean  $\pm$  SD (n=3; 60 gastruloids  
4 analysed). (D) Representative pictures (left) and colony type quantification (right) of colonies  
5 generated from 2i+LIF cells. Data are mean  $\pm$  SD (n=3; ~ 450 colonies analysed). (E) Flow  
6 cytometry scatter plot (FSC vs SSC) of 2i+LIF ESCs. Dead cells and debris are excluded based  
7 on FSC/SSC parameters. (F) Flow cytometry histograms of the different sorted populations from  
8 untreated FBS+LIF ESCs (left); bright field representative pictures of cell aggregates (middle),  
9 diameter distribution (right, top graph) at 48h after aggregation and percentage of undeveloped  
10 organoids at 120h after aggregation (right, bottom graph). Total population=red; population  
11 without dead cells and debris=light blue; narrow population = grey (n=3; 30 gastruloids/condition  
12 analysed; \*p<0.01) (bar= 100 $\mu$ m). (G) Representative picture (left) and colony type  
13 quantification (right) of colonies generated from 2i+LIF E14 ESCs (n=3; ~ 450 colonies  
14 analysed). (H) Flow cytometry scatter plot (FSC vs SSC) of 2i+LIF E14 ESCs (bar= 100 $\mu$ m). (I)  
15 Representative picture of elongated-shaped gastruloids at 120h (bar=100  $\mu$ m).

16

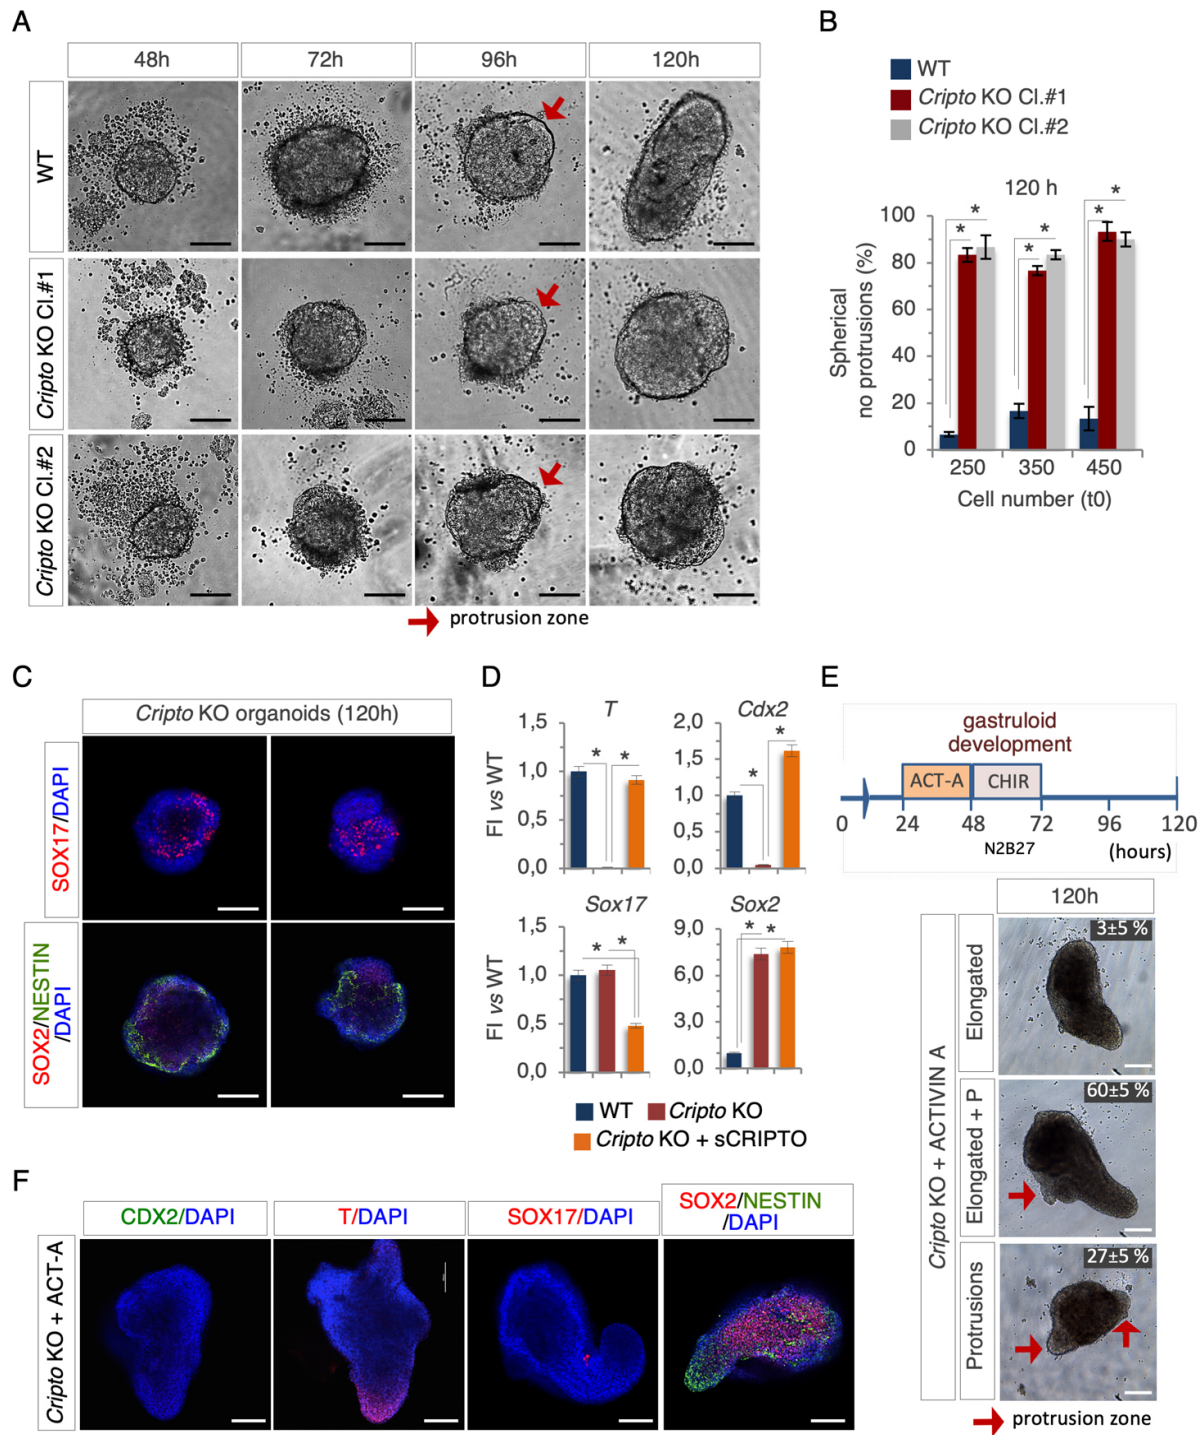

1

2 **Figure S2. Validation of the gastruloid formation assay using *Cripto* KO ESCs, Related to**

3 **Figure 2. (A) Time course bright field representative pictures of WT and *Cripto* KO (Cl.#1 and**

4 Cl.#2) aggregate to gastruloid transition. Light red arrows indicate the protrusion zone (bar=100

1  $\mu\text{m}$ ). **(B)** Percentage of spherical organoids without protrusions derived from WT (blue) and  
2 *Cripto* KO ESCs clones #1 (Cl.#1, red) and #2 (Cl.#2, grey). Data are mean  $\pm$  SD (n=3; 30  
3 gastruloids/condition analysed; \*p<0.01). **(C)** Representative confocal pictures of  
4 immunofluorescence with SOX17 (red) or SOX2/NESTIN (red/green) on *Cripto* KO-derived  
5 organoids at 120h. Nuclei were counterstained with DAPI (blue) (bar=100  $\mu\text{m}$ ). **(D)** qRT-PCR  
6 analysis of *T*, *Cdx2*, *Sox17* and *Sox2* in WT (blue), *Cripto* KO (red) and *Cripto* KO + sCRIPTO  
7 (orange) organoids at 120h. Data are normalized to *Gapdh* and are mean  $\pm$  SD of fold change  
8 (FI) vs WT (n $\geq$ 3; \*p<0.01). **(E)** Schematic representation of the experimental design (top).  
9 Representative bright field pictures and percentage distribution (bottom) of the different  
10 organoids generated from *Cripto* KO + ACT-A at 120h. Red arrows indicate the protrusion zone.  
11 Data are mean  $\pm$  SD (bar=100  $\mu\text{m}$ ). **(F)** Representative confocal images of CDX2 (green), T  
12 (red), SOX17 (red) and SOX2/NESTIN (red/green) on *Cripto* KO + ACT-A organoids (120h).  
13 Nuclei were counterstained with DAPI (blue) (bar=100  $\mu\text{m}$ ).  
14

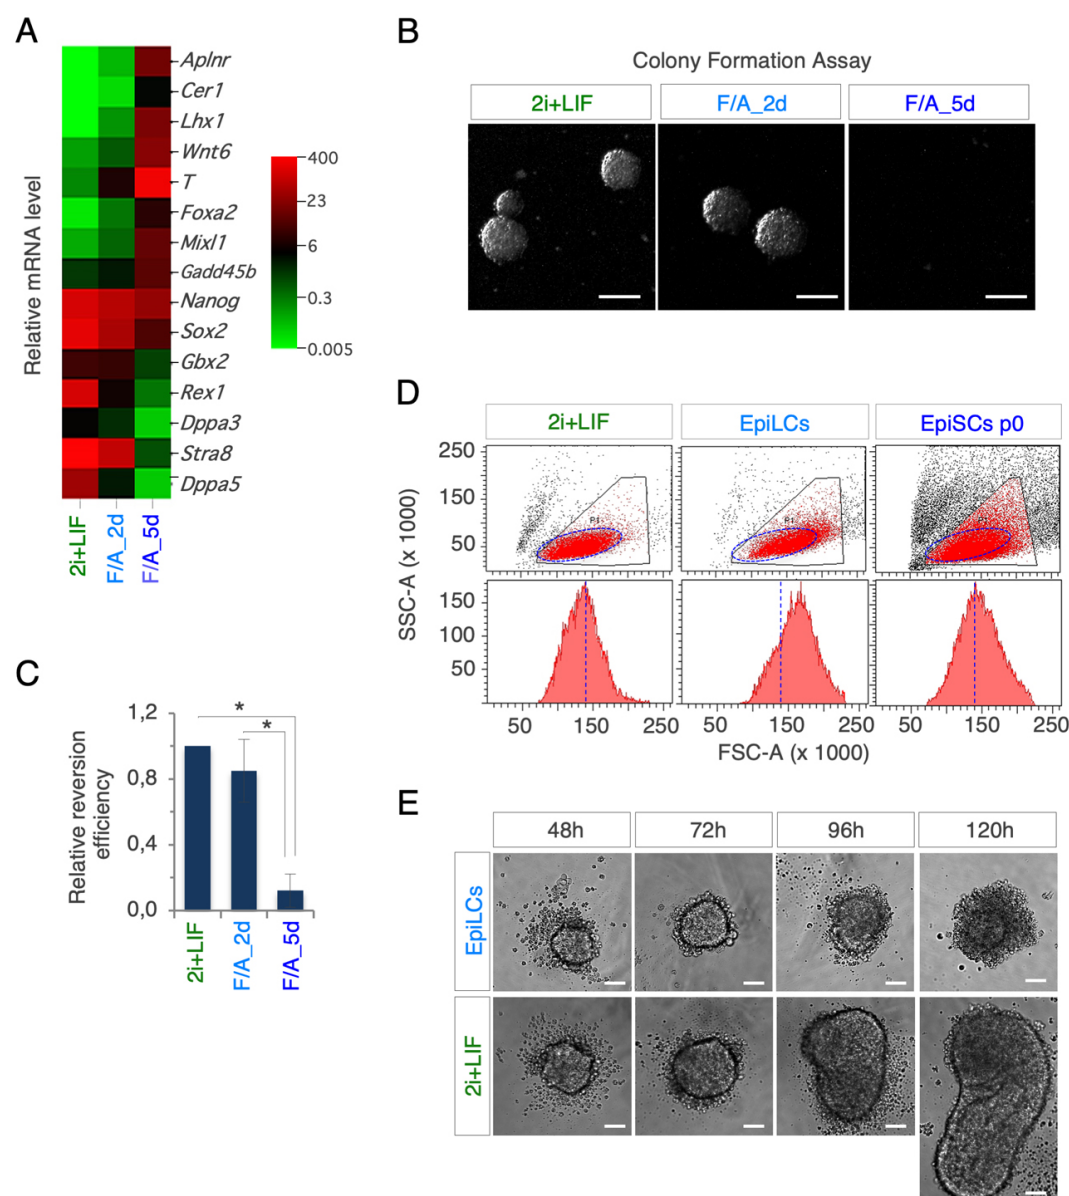

- 1 Representative bright field pictures of aggregates to gastruloid transition of EpiLCs and naïve
- 2 ESCs at the indicated time points (bar=50  $\mu\text{m}$ ).
- 3

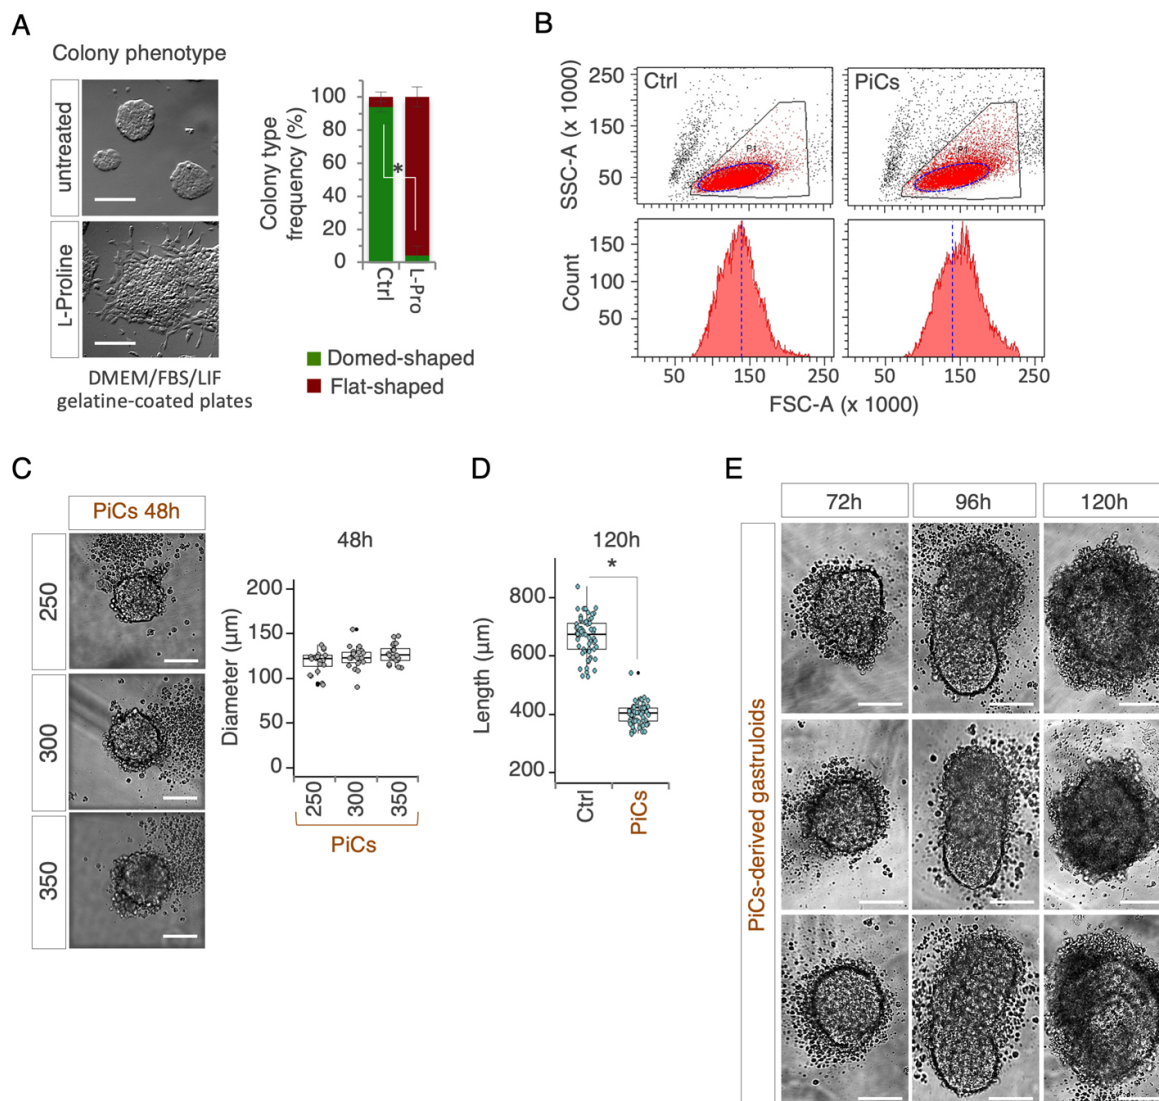

1 PiCs-derived gastruloids at 120h (n=3, 60 gastruloids/condition analysed; \*p<0,01). (E)

2 Representative bright field pictures of PiCs-derived gastruloids at the indicated time points

3 (bar=100  $\mu$ m).

4

1 **Table S1: List of Primers used in this study, Related to Figure 6 and Figure 7.**

| Gene symbol    | Forward (5'-3')         | Reverse (5'-3')             |
|----------------|-------------------------|-----------------------------|
| <i>Blimp1</i>  | GGTGAATCAGGGTGCCTTTA    | GAGAGGTGCAGGGAAGCAC         |
| <i>Cdx2</i>    | AGGAAGCCAAGTGAAAACCA    | CAGCCAGCTCACTTTTCCTC        |
| <i>Cer1</i>    | CAGGCCGTGACTCAGCCAGCAG  | CCGGGAAAACGAATGGAAGTGC      |
| <i>Esrrb</i>   | GGCCACCAATGAATGTGAG     | AGCCGTCGCTTGTACTTCTG        |
| <i>Fgf5</i>    | CAAAGTCAATGGCTCCCACGAAG | CTACAATCCCCTGAGACACAGCAAATA |
| <i>Gapdh</i>   | TGCACCACCAACTGCTTAGC    | TCTTCTGGGTGGCAGTGATG        |
| <i>Klf4</i>    | TAGTGGCGCCCTACAGCGGT    | TCGTGTGTGTTGGGCCGGTG        |
| <i>Nanog</i>   | AAGTACCTCAGCCTCCAGCA    | GTGCTGAGCCCTTCTGAATC        |
| <i>Nanos3</i>  | GGGTGCTGTGTCCCATTTTG    | ACCTGCATAGACACCTGCTG        |
| <i>Oct3-4</i>  | TCAGCTTGGGCTAGAGAAGG    | TGACGGGAACAGAGGGGAAAG       |
| <i>Prdm14</i>  | AAGGCACACAGGGACAACCTC   | CTGGTTCCGCTGGATGTCTC        |
| <i>Rex1</i>    | TTGCCTCGTCTTGCTTTAGG    | AAAATGAATGAACAAATGAAGAAAA   |
| <i>Sox17</i>   | AGCTAAGCAAGATGCTAGGCAAG | TCTCTGCCAAGGTCAACGC         |
| <i>Sox2</i>    | CACAACTCGGAGATCAGCAA    | CTCCGGGAAGCGTGTACTTA        |
| <i>T/Bra</i>   | GAACCTCGGATTCACATCGT    | TTCTTTGGCATCAAGGAAGG        |
| <i>Tfcp2l1</i> | TGCCCATCTTCAAGC         | CCAGCAGCCGGATT              |

2  
3  
4 **Table S2: List of primary and secondary antibodies used in this study, Related to Figure 1, 2, 5,**  
5 **6 and 7.**

| ANTIBODY                               | COMPANY                 | CAT. NO.  | APPLICATION |
|----------------------------------------|-------------------------|-----------|-------------|
| AP2 $\gamma$                           | Santa Cruz              | sc-53162  | IF 1:100    |
| BLIMP1                                 | Santa Cruz              | sc-47732  | IF 1:50     |
| CDX2                                   | Cell Signaling          | 3977      | IF 1:100    |
| Ki67                                   | ThermoFisher Scientific | MA5-14520 | IF 1:50     |
| NANOG                                  | Cell Signaling          | 8822      | IF 1:400    |
| NESTIN                                 | Santa Cruz              | sc-33677  | IF 1:100    |
| OCT4                                   | Santa Cruz              | sc-8628   | IF 1:100    |
| SOX17                                  | R&D                     | AF1924    | IF 1:200    |
| SOX2                                   | Cell Signaling          | D1C7J     | IF 1:100    |
| T                                      | Santa Cruz              | sc-17745  | IF 1:200    |
| Alexa Fluor 488 Donkey anti-Goat IgG   | Invitrogen              | A11055    | IF 1:400    |
| Alexa Fluor 488 Donkey anti-Rabbit IgG | Invitrogen              | A21206    | IF 1:400    |
| Alexa Fluor 594 Donkey anti-Rabbit IgG | Invitrogen              | A21207    | IF 1:400    |
| Alexa Fluor 594 Donkey anti-Goat IgG   | Invitrogen              | A11058    | IF 1:400    |
| Alexa Fluor 594 Donkey anti-Mouse IgG  | Invitrogen              | A21203    | IF 1:400    |
| Alexa Fluor 647 Goat anti-Rat IgG      | Invitrogen              | A-21247   | IF 1:400    |

## 1    **Supplemental Experimental Procedures**

2

### 3    **EpiLCs, EpiSCs, L-Proline- induced cells (PiCs) and Primordial Germ Cell-like cells (PGCLCs)** 4    **generation.**

5    To generate EpiLC and EpiSCs (p0), 2i+LIF mESCs were seeded at 1500 cells/cm<sup>2</sup> onto FBS-coated  
6    plates in N2B27 supplemented with ACTIVIN A (20 ng/ml; Invitrogen) and bFGF (12 ng/ml;  
7    Provitro) and cultured for 2 and 5 days, respectively.

8    To generate PiCs (Comes et al, 2013), ESCs were plated at low density (50–250 cells/cm<sup>2</sup>) on gelatin-  
9    coated plates in DMEM/15%FBS/LIF supplemented with L-Pro (250–500 μM) (Sigma-Aldrich) and  
10    grown for 4-5 days. Crystal Violet cell colony staining and colony type analysis (domed vs flat) was  
11    performed as previously described (Comes et al., 2013). The analysis was performed blinded by two  
12    investigators on at least 400 colonies per condition.

13    For PGCLCs differentiation, 2.5x10<sup>4</sup> cells/well were plated in U-shaped ultra-low attachment 96-  
14    multiwell (Corning Costar) in serum-free GK15 (GMEM [Invitrogen]) medium containing 15%  
15    KSR, 0.1 mM NEAA, 1 mM sodium pyruvate, 0.1 mM 2-mercaptoethanol, 100 U/ml penicillin, 0.1  
16    mg/ml streptomycin, and 2 mM L-glutamine. To induce PGCLC differentiation, complete medium  
17    was supplemented with BMP4 (500 ng/ml; R&D Systems), LIF (1000 u/ml; ESGRO, Millipore),  
18    SCF (100 ng/ml; R&D Systems), and EGF (50 ng/ml; R&D Systems). After 4 days, the cell  
19    aggregates were dissociated with Trypsin and analysed.

20

### 21    **Immunofluorescence analysis**

22    Stem cell colonies were dissociated with either accutase or trypsin-EDTA (5 min at 37°C), cells were  
23    re-suspended in 15% FBS/1x PBS and centrifuged (800 rpm for 8 min) onto glass slides (5x10<sup>5</sup>

1 cells/spot) using a Thermo Shandon Cytocentrifuge (CytoSpin™ 4). Cytospin cell samples were  
2 fixed in 4% paraformaldehyde (PFA), permeabilized in 0.1% Triton X-100 (10min at RT) and  
3 incubated overnight at 4°C with primary antibodies. After washing (0,5% Tween-1x PBS), cells were  
4 incubated with appropriate secondary antibodies. Nuclei were counterstained with DAPI  
5 (Invitrogen). Images were obtained using the DMI6000B microscope and the DFC 350FX B/W  
6 digital camera (Leica Microsystems). Confocal images were obtained on a Nikon A1 microscope.  
7 The AF6000 (Leica Microsystems) and NIS Element C (Nikon, Tokyo) software were used for image  
8 acquisition/elaboration. Primary and secondary antibodies are listed in Supplementary Table 2.

9

10
